# Supplementary material
Source: HighWire-hosted journal article supplement (http://www.cmaj.ca/highwire/filestream/59168/field_highwire_adjunct_files/7/birth-urquia-8-at.pdf)
Supplement: birth-urquia-8-at.pdf [file birth-urquia-8-at.pdf]

**Appendix 8 (as supplied by the authors): Adjusted odds ratios, sensitivity, specificity and area under the curve (AUC) measures for adverse neonatal and obstetric outcomes among 328 387 singleton live births to immigrant women according to the method used to classify infants as small for gestational age (SGA) (< 10th percentile) or large for gestational age (LGA) ( $\geq$  90th percentile) on a birth-weight curve for newborns of women from their respective world region of origin versus on a birth-weight curve for newborns of Canadian-born women**

| Outcome                                       | Adjusted odds ratio (95% CI)*   |                           | Sensitivity, %                  |                    | Specificity, %                  |                    | AUC, % (95% CI)                 |                        |                                                                                          |         |
|-----------------------------------------------|---------------------------------|---------------------------|---------------------------------|--------------------|---------------------------------|--------------------|---------------------------------|------------------------|------------------------------------------------------------------------------------------|---------|
|                                               | For world region-specific curve | For Canadian curve        | For world region-specific curve | For Canadian curve | For world region-specific curve | For Canadian curve | For world region-specific curve | For Canadian curve     | Adjusted difference (95% CI) in AUC of world region-specific curve minus Canadian curve* | p value |
| <b>Related to SGA</b>                         |                                 |                           |                                 |                    |                                 |                    |                                 |                        |                                                                                          |         |
| Neonatal death < 28 days                      |                                 |                           |                                 |                    |                                 |                    |                                 |                        |                                                                                          |         |
| All infants                                   | 14.28<br>(12.02 to 16.98)       | 9.63<br>(8.07 to 11.49)   | 61.6                            | 65.7               | 89.8                            | 83.6               | 75.7<br>(73.7 to 77.7)          | 74.6<br>(72.7 to 76.6) | 1.0 (0.0 to 1.9)                                                                         | 0.014   |
| Preterm infants born at 23–36 weeks           | 16.09<br>(12.50 to 20.73)       | 12.93<br>(10.02 to 16.69) | 77.7                            | 79.9               | 82.4                            | 77.7               | 80.0<br>(78.9 to 82.2)          | 78.8<br>(76.7 to 80.9) | 1.3 (0.5 to 2.0)                                                                         | 0.002   |
| Term infants born at 37–41 weeks              | 4.41<br>(3.26 to 5.95)          | 3.40<br>(2.54 to 4.54)    | 32.7                            | 40.2               | 90.3                            | 83.9               | 61.5<br>(58.2 to 64.7)          | 62.1<br>(58.7 to 65.5) | -0.6 (-2.5 to 1.2)                                                                       | 0.50    |
| Newborn hospital length of stay $\geq$ 7 days | 3.88<br>(3.72, 4.06)            | 2.82<br>(2.71 to 2.94)    | 29.8                            | 36.0               | 90.4                            | 84.2               | 60.1<br>(59.6 to 60.5)          | 60.1<br>(59.7 to 60.6) | -0.0 (-0.3 to 0.3)                                                                       | 0.84    |
| NICU admission                                | 2.30<br>(2.23, 2.36)            | 1.72<br>(1.68 to 1.77)    | 19.0                            | 25.4               | 91.2                            | 84.8               | 55.0<br>(54.8 to 55.2)          | 55.1<br>(54.9 to 55.4) | -0.1 (-0.3 to 0.0)                                                                       | 0.033   |
| Mechanical ventilation                        | 3.53<br>(3.34, 3.72)            | 2.46<br>(2.33 to 2.59)    | 28.1                            | 32.3               | 90.1                            | 83.9               | 59.1<br>(58.6 to 59.6)          | 58.1<br>(57.6 to 58.6) | 1.0 (0.8 to 1.3)                                                                         | < 0.001 |
| Intrauterine hypoxia or birth asphyxia        | 1.62<br>(1.43, 1.84)            | 1.37<br>(1.22 to 1.53)    | 16.9                            | 22.8               | 89.8                            | 83.5               | 53.3<br>(52.5 to 54.2)          | 53.1<br>(52.2 to 54.1) | 0.3 (-0.3 to 0.8)                                                                        | 0.43    |

*continued*

# Appendix 8 (continued)

| Outcome                                     | Adjusted odds ratio (95% CI)*   |                         | Sensitivity (%)                 |                         | Specificity (%)                 |                         | AUC (% , 95% CI)                |                         |                                                                                               |         |
|---------------------------------------------|---------------------------------|-------------------------|---------------------------------|-------------------------|---------------------------------|-------------------------|---------------------------------|-------------------------|-----------------------------------------------------------------------------------------------|---------|
|                                             | For World region specific curve | For Canadian-born curve | For World region specific curve | For Canadian-born curve | For World region specific curve | For Canadian-born curve | For World region specific curve | For Canadian-born curve | Adjusted difference (95% CI) in AUC of World region specific curve minus Canadian-born curve* | P-value |
| <b>Related to LGA</b>                       |                                 |                         |                                 |                         |                                 |                         |                                 |                         |                                                                                               |         |
| <b>Neonatal</b>                             |                                 |                         |                                 |                         |                                 |                         |                                 |                         |                                                                                               |         |
| Neonatal death < 28 days**                  | 0.88<br>(0.60 to 1.30)          | 0.66<br>(0.47 to 0.92)  | 6.5                             | 4.7                     | 90.3                            | 94.6                    | 51.6<br>(50.6 to 52.7)          | 50.4<br>(49.5 to 51.2)  | 1.3 (0.7 to 1.8)                                                                              | < 0.001 |
| Newborn hospital length of stay ≥ 7 days    | 1.13<br>(1.04 to 1.22)          | 0.84<br>(0.78 to 0.90)  | 8.2                             | 5.8                     | 90.2                            | 94.6                    | 50.8<br>(50.5 to 51.1)          | 50.2<br>(50.0 to 50.4)  | 0.6 (0.1 to 1.1)                                                                              | 0.014   |
| NICU admission                              | 1.77<br>(1.70 to 1.84)          | 1.42<br>(1.38 to 1.47)  | 12.3                            | 7.9                     | 90.7                            | 95.0                    | 51.5<br>(51.3 to 51.7)          | 51.4<br>(51.3 to 51.6)  | 0.1 (-0.1 to 0.2)                                                                             | 0.21    |
| Mechanical ventilation                      | 1.41<br>(1.29 to 1.54)          | 1.18<br>(1.09 to 1.27)  | 10.9                            | 7.3                     | 90.3                            | 94.7                    | 50.6<br>(50.2 to 51.0)          | 51.0<br>(50.7 to 51.3)  | -0.4 (-0.6 to -0.2)                                                                           | 0.001   |
| Birth trauma                                | 2.53<br>(2.29 to 2.79)          | 2.10<br>(1.94 to 2.29)  | 17.0                            | 11.2                    | 90.4                            | 94.7                    | 53.7<br>(53.1 to 54.3)          | 52.9<br>(52.5 to 53.4)  | 0.8 (0.4 to 1.1)                                                                              | < 0.001 |
| <b>Obstetric</b>                            |                                 |                         |                                 |                         |                                 |                         |                                 |                         |                                                                                               |         |
| Third- or fourth-degree perineal laceration | 1.88<br>(1.74 to 2.03)          | 1.79<br>(1.68 to 1.89)  | 13.7                            | 7.5                     | 90.4                            | 94.7                    | 52.1<br>(51.7 to 52.4)          | 51.1<br>(50.8 to 51.4)  | 1.0 (0.7 to 1.2)                                                                              | < 0.001 |
| Obstructed labour due to shoulder dystocia  | 7.24<br>(6.81 to 7.69)          | 6.77<br>(6.40 to 7.15)  | 41.0                            | 28.4                    | 90.8                            | 95.0                    | 65.9<br>(65.3 to 66.6)          | 61.7<br>(61.1 to 62.3)  | 4.2 (3.8 to 4.6)                                                                              | < 0.001 |
| Postpartum hemorrhage                       | 1.80<br>(1.68 to 1.94)          | 1.70<br>(1.61 to 1.81)  | 14.9                            | 8.9                     | 90.4                            | 94.7                    | 52.6<br>(52.3 to 53.0)          | 51.8<br>(51.5 to 52.1)  | 0.8 (0.6 to 1.1)                                                                              | < 0.001 |

Note: CI = confidence interval, NICU = neonatal intensive care unit.

\*Adjusted for maternal age, parity and year of delivery, maternal education, marital status, refugee status, knowledge of Canadian languages, duration of residence in Canada, World region of origin and neighborhood income quintiles.

\*\*Neonatal deaths were not separated for preterm and term infants due very low event rates and counts fewer than five.
